# Supplementary material for: Potential for Drug-Drug Interactions between Antiretrovirals and HCV Direct Acting Antivirals in a Large Cohort of HIV/HCV Coinfected Patients
Source: PubMed Central journal article supplement (PMC4619009; doi:10.1371/journal.pone.0141164), 2015-10-21
Supplement: pone.0141164.s002.pdf [file pone.0141164.s002.pdf]

**Supporting Table 2:** Last available fibrosis assessment with breakdown according to the mode of assessment (LB, liver biopsy; FS, Fibroscan<sup>®</sup>; FT, Fibrotest<sup>®</sup>)

| n (%) | Naive patients<br>(n = 525) |            |           | Treatment-experienced patients<br>(n = 443) |            |           |
|-------|-----------------------------|------------|-----------|---------------------------------------------|------------|-----------|
|       | LB                          | FS         | FT        | LB                                          | FS         | FT        |
| F0-F1 | 22 (53.7)                   | 212 (60.9) | 73 (38.2) | 9 (14.1)                                    | 132 (44.9) | 18 (13.8) |
| F2    | 12 (29.3)                   | 95 (27.3)  | 49 (25.7) | 22 (34.4)                                   | 88 (29.9)  | 39 (30.0) |
| F3    | 2 (4.9)                     |            | 25 (13.1) | 16 (25.0)                                   |            | 22 (16.9) |
| F4    | 5 (12.2)                    | 41 (11.8)  | 44 (23.0) | 17 (26.7)                                   | 74 (25.2)  | 51 (39.2) |
| Total | 41                          | 348        | 191       | 64                                          | 294        | 130       |

*55 naive patients and 45 treatment-experienced patients had multiple evaluations of fibrosis at the same time.*

*Cut-off for Fibroscan<sup>®</sup> values: ≤7 kPa: F0-F1; 7-14.5 kPa: F2-F3; ≥14.5 kPa: F4*

*Cut-off for Fibrotest<sup>®</sup> values: ≤0.31: F0-1; 0.32–0.58: F2; 0.59–0.72: F3; 0.73–1.00: F4*
