# Supplementary material for: Potential for Drug-Drug Interactions between Antiretrovirals and HCV Direct Acting Antivirals in a Large Cohort of HIV/HCV Coinfected Patients
Source: PLoS One. 2015 Oct 21;10(10):e0141164. doi: 10.1371/journal.pone.0141164 (PMC4619009; doi:10.1371/journal.pone.0141164)
Supplement: S1 Table — (PDF) [file pone.0141164.s001.pdf]

**Supporting Table 1:** Demographics and baseline characteristics in HIV/HCV coinfectd and HIV-monoinfected patients in the French DAT'AIDS cohort.

|                                                    | HIV monoinfected<br>patients<br>(n= 14,123) | HIV/HCV coinfectd<br>patients<br>(n= 2,511) | <i>p</i> |
|----------------------------------------------------|---------------------------------------------|---------------------------------------------|----------|
| Male, n (%)                                        | 10,030 (71.0)                               | 1,800 (71.7)                                | 0.498    |
| Age (years), median [IQR]                          | 46.0 [39.0-54.0]                            | 49.0 [45.0-53.0]                            | <0.001   |
| HIV transmission risk group, n (%)                 |                                             |                                             | <0.001   |
| - heterosexual                                     | 6,159 (43.6%)                               | 513 (21%)                                   |          |
| - homo/bisexual                                    | 6,373 (45.1%)                               | 396 (16%)                                   |          |
| - IVDU                                             | 129 (0.9%)                                  | 1,345 (54%)                                 |          |
| - other/unknown                                    | 1462 (10.3%)                                | 257 (10.2%)                                 |          |
| Alcohol consumption, n (%)                         | n=10170                                     | n=2157                                      | <0.001   |
| - None                                             | 4959 (48.8%)                                | 792 (36.8%)                                 |          |
| - Former                                           | 431 (4.2%)                                  | 341 (15.8%)                                 |          |
| - Current                                          | 4780 (47.0%)                                | 1024 (47.5%)                                |          |
| Current alcohol intake, n (%)                      | n=4780                                      | n=1024                                      | <0.001   |
| - <20 g/day                                        | 3587 (35.3%)                                | 639 (29.6%)                                 |          |
| - 20-50 g/day                                      | 870 (8.6%)                                  | 239 (11.1%)                                 |          |
| - >50 g/day                                        | 323 (3.2%)                                  | 146 (6.8%)                                  |          |
| Smoking, n (%)                                     | n=10949                                     | n=2241                                      | <0.001   |
| - None                                             | 4833 (44.1%)                                | 373 (16.6%)                                 |          |
| - Former                                           | 2063 (18.8%)                                | 375 (16.7%)                                 |          |
| - Current                                          | 4053 (37.0%)                                | 1493 (66.6%)                                |          |
| Substance abuse, n (%)                             | n=8013                                      | n=1876                                      | <0.001   |
| - None                                             | 7091 (88.5%)                                | 666 (35.5%)                                 |          |
| - Former                                           | 384 (4.8%)                                  | 667 (35.6%)                                 |          |
| - Opiate substitution                              | 32 (0.4%)                                   | 266 (14.2%)                                 |          |
| - Current                                          | 506 (6.3%)                                  | 277 (14.8%)                                 |          |
| Follow-up of HIV infection (years), median [IQR]   | 11.0 [5.0-18.0]                             | 21.0 [15.0-25.0]                            | <0.001   |
| CDC Stage C, n (%)                                 | 3,074 (21.8)                                | 692 (27.6%)                                 | <0.001   |
| Under cART, n (%)                                  | 13,232 (93.7)                               | 2,424 (96.5%)                               | <0.001   |
| Nadir CD4 (cells/mm <sup>3</sup> ), median [IQR]   | 226 [106-338]                               | 166 [74-259]                                | <0.001   |
| Current CD4 (cells/mm <sup>3</sup> ), median [IQR] | 587 [420-778]                               | 561 [368-780]                               | <0.001   |
| Plasma HIV-RNA < 50 copies/mL, n (%)               | 11,368 (87.7%)                              | 2,092 (88.0%)                               | 0.454    |
| cART exposure (years), median [IQR]                | 9.0 [3.0-15.0]                              | 15.0 [9.0-17.6]                             | <0.001   |
| Number of cART lines, median [IQR]                 | 4 [2-7]                                     | 6 [3-10]                                    | <0.001   |
| cART naive patients, n (%)                         | 703 (5.0%)                                  | 55 (2.2%)                                   | <0.001   |

*CDC Centers for Diseases Control; cART combined antiretroviral treatment; IQR interquartile range, IVDU intravenous drug use.*
